# Supplementary material for: The role of LINC00094/miR‐224‐5p (miR‐497‐5p)/Endophilin‐1 axis in Memantine mediated protective effects on blood‐brain barrier in AD microenvironment
Source: PubMed Central journal article supplement (PMC6484416; doi:10.1111/jcmm.14214), 2019-02-22
Supplement: JCMM-23-3280-s002.pdf [file JCMM-23-3280-s002.pdf]

**The Role of LINC00094/ miR-224-5p (miR-497-5p)/ Endophilin-1 Pathway in  
Memantine Regulating the Permeability of Blood-Brain Barrier**

Lu Zhu<sup>a</sup>, Meiqing Lin<sup>a</sup>, Jun Ma<sup>b, c</sup>, Wenjing Liu<sup>d</sup>, Lili Gao<sup>a</sup>, Shanshan Wei<sup>a</sup>, Yixue  
Xue<sup>b, c</sup>, Xiuli Shang<sup>a, \*</sup>

**Table S1. Primer and probes used for RT-qPCR**

| Primer or Probe | Gene         | Sequence(5'->3') or Assay ID                       |
|-----------------|--------------|----------------------------------------------------|
| Primer          | LINC00094    | F:ATGGAAATGAGGCCATCTTG<br>R:AAGTGTGGTCCTGGGTTTCAG  |
|                 | GAPDH        | F:CCCATCACCATCTTCCAGGAG<br>R:GTTGTCATGGATGACCTTGCC |
| Probe           | miR-224-5p   | 002099(Applied biosystems)                         |
|                 | miR-497-5p   | 001043(Applied biosystems)                         |
|                 | Endophilin-1 | Hs00182352_ml(Applied biosystems)                  |
|                 | U6           | 001973(Applied biosystems)                         |
|                 | GAPDH        | Hs03929097_g(Applied biosystems)                   |

**Table S2. Sequences of shRNA template**

| Gene      |           | Sequence(5'->3')                                                    |
|-----------|-----------|---------------------------------------------------------------------|
| LINC00094 | Sence     | CACCGCAGGTGTCTCTTGTCAAAGCTTCAAG<br>AGAGCTTTGACAAGAGACACCTGCTTTTTTTG |
|           | Antisence | GATCCAAAAAAGCAGGTGTCTCTTGTCAAAG<br>CTCTCTTGAAGCTTTGACAAGAGACACCTGC  |
| NC        | Sence     | CACCGTTCTCCGAACGTGTCACGTCAAGA<br>GATTACGTGACACGTTCCGGAGAATTTTTTG    |
|           | Antisence | GATCCAAAAAAGTTCTCCGAACGTGTCACG<br>TAATCTCTTGACGTGACACGTTCCGGAGAAC   |
